# Supplementary material for: Epigenome-Wide Association Studies of the Fractional Exhaled Nitric Oxide and Bronchodilator Drug Response in Moderate-to-Severe Pediatric Asthma
Source: MDPI journal article supplement (doi:10.3390/biomedicines11030676), 2023-02-23
Supplement: s1 [file s1]

## Supplementary SI: SysPharmPediA consortium members (authors list)

| Name                                      | Country         | Affiliation                                                                                                                                                                                                                                                                                                                                                      |
|-------------------------------------------|-----------------|------------------------------------------------------------------------------------------------------------------------------------------------------------------------------------------------------------------------------------------------------------------------------------------------------------------------------------------------------------------|
| Olaia Sardón-Prado, MD, PhD               | Spain           | Division of Pediatric Respiratory Medicine, Hospital Universitario Donostia, San Sebastián, Spain<br>Department of Pediatrics, University of the Basque Country (UPV/EHU), San Sebastián, Spain.                                                                                                                                                                 |
| Paula Corcuera-Elosegui, MD, PhD          | Spain           | Division of Pediatric Respiratory Medicine, Hospital Universitario Donostia, San Sebastián, Spain.                                                                                                                                                                                                                                                               |
| Javier Korta-Murua, MD, PhD               | Spain           | Division of Pediatric Respiratory Medicine, Hospital Universitario Donostia, San Sebastián, Spain                                                                                                                                                                                                                                                                |
| Mahmoud I. Abdel-Aziz, PhD                | The Netherlands | Department of Respiratory Medicine, Amsterdam UMC, University of Amsterdam, Amsterdam, The Netherlands.<br>Department of Clinical Pharmacy, Faculty of Pharmacy, Assiut University, Assiut, Egypt.                                                                                                                                                               |
| Paul Brinkman, PhD                        | The Netherlands | Department of Respiratory Medicine, Amsterdam UMC, University of Amsterdam, Amsterdam, The Netherlands.                                                                                                                                                                                                                                                          |
| Susanne J. H. Vijverberg, PhD             | The Netherlands | Department of Respiratory Medicine, Amsterdam UMC, University of Amsterdam, Amsterdam, The Netherlands.                                                                                                                                                                                                                                                          |
| Anne H. Neerincx, PhD                     | The Netherlands | Department of Respiratory Medicine, Amsterdam UMC, University of Amsterdam, Amsterdam, The Netherlands.                                                                                                                                                                                                                                                          |
| Simone Hashimoto, MD, PhD                 | The Netherlands | Department of Respiratory Medicine, Amsterdam UMC, University of Amsterdam, Amsterdam, The Netherlands.<br>Department of Pediatric Respiratory Medicine, Emma Children's Hospital, Amsterdam UMC, Amsterdam, The Netherlands.                                                                                                                                    |
| Aletta D. Kraneveld, PhD                  | The Netherlands | Division of Pharmacology, Utrecht Institute for Pharmaceutical Sciences, Faculty of Science, Utrecht University, Utrecht, the Netherlands.<br>Institute for Risk Assessment Sciences, Faculty of Veterinary Medicine, Utrecht University, Utrecht, the Netherlands.                                                                                              |
| Anke H. Maitland-van der Zee, PharmD, PhD | The Netherlands | Department of Respiratory Medicine, Amsterdam UMC, University of Amsterdam, Amsterdam, The Netherlands.<br>Department of Pediatric Respiratory Medicine, Emma Children's Hospital, Amsterdam UMC, Amsterdam, The Netherlands.                                                                                                                                    |
| Maria Pino-Yanes, PhD                     | Spain           | Genomics and Health Group, Department of Biochemistry, Microbiology, Cell Biology and Genetics, Universidad de La Laguna, La Laguna, Santa Cruz de Tenerife, Spain.<br>CIBER de Enfermedades Respiratorias, Instituto de Salud Carlos III, Madrid, Spain.<br>Instituto de Tecnologías Biomédicas (ITB), Universidad de La Laguna, Santa Cruz de Tenerife, Spain. |
| Esther Herrera-Luis, PhD                  | Spain           | Genomics and Health Group, Department of Biochemistry, Microbiology, Cell Biology and Genetics, Universidad de La Laguna, La Laguna, Santa Cruz de Tenerife, Spain.                                                                                                                                                                                              |
| Javier Perez-Garcia, PharmD               | Spain           | Genomics and Health Group, Department of Biochemistry, Microbiology, Cell Biology and Genetics, Universidad de La Laguna, La Laguna, Santa Cruz de Tenerife, Spain.                                                                                                                                                                                              |
| Mario Martin-Almeida, BSc                 | Spain           | Genomics and Health Group, Department of Biochemistry, Microbiology, Cell Biology and Genetics, Universidad de La Laguna, La Laguna, Santa Cruz de Tenerife, Spain.                                                                                                                                                                                              |
| Uroš Potočnik, PhD                        | Slovenia        | Center for Human Molecular Genetics and Pharmacogenomics, Faculty of Medicine, University of Maribor, Maribor, Slovenia.                                                                                                                                                                                                                                         |

|                            |                 |                                                                                                                                                                                                                                                                                                                                                                                                                  |
|----------------------------|-----------------|------------------------------------------------------------------------------------------------------------------------------------------------------------------------------------------------------------------------------------------------------------------------------------------------------------------------------------------------------------------------------------------------------------------|
|                            |                 | Laboratory for Biochemistry, Molecular biology and Genomics, Faculty of Chemistry and Chemical Engineering, University of Maribor, Maribor, Slovenia.<br>Department for Science and Research, University Medical Centre Maribor, Maribor, Slovenia                                                                                                                                                               |
| Mario Gorenjak MBI, PhD    | Slovenia        | Center for Human Molecular Genetics and Pharmacogenomics, Faculty of Medicine, University of Maribor, Maribor, Slovenia.                                                                                                                                                                                                                                                                                         |
| Vojko Berce MD, PhD        | Slovenia        | Center for Human Molecular Genetics and Pharmacogenomics, Faculty of Medicine, University of Maribor, Maribor, Slovenia.<br>Clinic of Pediatrics, University Medical Centre Maribor, Maribor, Slovenia.                                                                                                                                                                                                          |
| Maya Petek, PhD            | Slovenia        | Center for Human Molecular Genetics and Pharmacogenomics, Faculty of Medicine, University of Maribor, Maribor, Slovenia.                                                                                                                                                                                                                                                                                         |
| Michael Kabesch, MD, PhD   | Germany         | Department of Pediatric Pneumology and Allergy, University Children's Hospital Regensburg (KUNO) at the Hospital St. Hedwig of the Order of St. John, University of Regensburg, Regensburg, Germany.<br>Science and Development Campus Regensburg (WECARE), University Children's Hospital Regensburg (KUNO) at the Hospital St. Hedwig of the Order of St. John, University of Regensburg, Regensburg, Germany. |
| Susanne Harner             | Germany         | Department of Pediatric Pneumology and Allergy, University Children's Hospital Regensburg (KUNO) at the Hospital St. Hedwig of the Order of St. John, University of Regensburg, Regensburg, Germany.                                                                                                                                                                                                             |
| Christine Wolff            | Germany         | Science and Development Campus Regensburg (WECARE), University Children's Hospital Regensburg (KUNO) at the Hospital St. Hedwig of the Order of St. John, University of Regensburg, Regensburg, Germany                                                                                                                                                                                                          |
| Antoaneta Toncheva         | Germany         | Department of Pediatric Pneumology and Allergy, University Children's Hospital Regensburg (KUNO) at the Hospital St. Hedwig of the Order of St. John, University of Regensburg, Regensburg, Germany.                                                                                                                                                                                                             |
| Susanne Brandstetter       | Germany         | Science and Development Campus Regensburg (WECARE), University Children's Hospital Regensburg (KUNO) at the Hospital St. Hedwig of the Order of St. John, University of Regensburg, Regensburg, Germany.                                                                                                                                                                                                         |
| Elisa Valletta             | Germany         | Science and Development Campus Regensburg (WECARE), University Children's Hospital Regensburg (KUNO) at the Hospital St. Hedwig of the Order of St. John, University of Regensburg, Regensburg, Germany.                                                                                                                                                                                                         |
| Heike Buntrock-Döpke       | Germany         | Science and Development Campus Regensburg (WECARE), University Children's Hospital Regensburg (KUNO) at the Hospital St. Hedwig of the Order of St. John, University of Regensburg, Regensburg, Germany.                                                                                                                                                                                                         |
| Joris C. Verster, PhD      | The Netherlands | Division of Pharmacology, Utrecht Institute for Pharmaceutical Sciences, Faculty of Science, Utrecht University, Utrecht, the Netherlands.<br>Institute for Risk Assessment Sciences, Faculty of Veterinary Medicine, Utrecht University, Utrecht, the Netherlands.                                                                                                                                              |
| Nikki Kerssemakers         | The Netherlands | Division of Pharmacology, Utrecht Institute for Pharmaceutical Sciences, Faculty of Science, Utrecht University, Utrecht, the Netherlands.                                                                                                                                                                                                                                                                       |
| Catarina Almqvist, MD, PhD | Sweden          | Dept of Medical Epidemiology and Biostatistics, Karolinska Institutet, Stockholm, Sweden.<br>Pediatric Allergy and Pulmonology Unit at Astrid Lindgren Children's Hospital, Karolinska University Hospital.                                                                                                                                                                                                      |

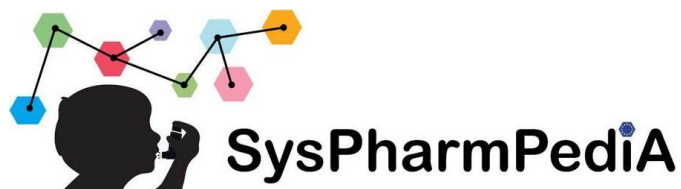

|                     |        |                                                                                           |
|---------------------|--------|-------------------------------------------------------------------------------------------|
| Anna Hedman, PhD    | Sweden | Dept of Medical Epidemiology and Biostatistics, Karolinska Institutet, Stockholm, Sweden. |
| Mwenya Mubanga, PhD | Sweden | Dept of Medical Epidemiology and Biostatistics, Karolinska Institutet, Stockholm, Sweden. |
| Tong Gong, PhD      | Sweden | Dept of Medical Epidemiology and Biostatistics, Karolinska Institutet, Stockholm, Sweden. |
| Anne Örtqvist       | Sweden | Dept of Medical Epidemiology and Biostatistics, Karolinska Institutet, Stockholm, Sweden. |
