# Supplementary material for: Epigenome-Wide Association Studies of the Fractional Exhaled Nitric Oxide and Bronchodilator Drug Response in Moderate-to-Severe Pediatric Asthma
Source: MDPI journal article supplement (doi:10.3390/biomedicines11030676), 2023-02-23
Supplement: s1 [file s1]

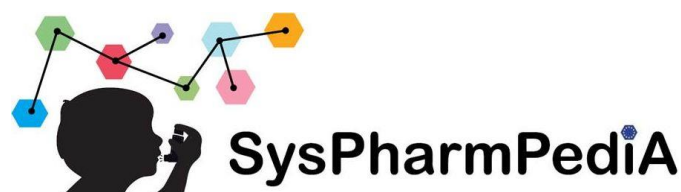

## Supplementary SII: Acknowledgements

The SysPharmPediA consortium wishes to acknowledge the help and expertise of the following individuals and groups without whom, the study would not have been possible.

### Others that contributed to SysPharmPediA:

| Name                                    | Country         | Affiliation                                                                                                                                              |
|-----------------------------------------|-----------------|----------------------------------------------------------------------------------------------------------------------------------------------------------|
| Amaia Lorea Alvarez RN                  | Spain           | Division of Pediatric Respiratory Medicine, Hospital Universitario Donostia, San Sebastián, Spain.                                                       |
| Arantzazu Zugasti Pérez RN              | Spain           | Division of Pediatric Respiratory Medicine, Hospital Universitario Donostia, San Sebastián, Spain.                                                       |
| Miren Lorea Otero Aramburu, NA          | Spain           | Division of Pediatric Respiratory Medicine, Hospital Universitario Donostia, San Sebastián, Spain.                                                       |
| María Isabel Gomez Osua RN <sup>3</sup> | Spain           | Basque Biobank (Basque Biobank), Biodonostia Health Research Institute Association Node <a href="http://www.biobancovasco.org">www.biobancovasco.org</a> |
| Yennece W.F. Dagelet                    | The Netherlands | Department of Respiratory Medicine, Amsterdam UMC, University of Amsterdam, Amsterdam, The Netherlands.                                                  |
| Suzanne Terheggen-Lagro MD, PhD         | The Netherlands | Department of Pediatric Respiratory Medicine, Emma Children's Hospital, Amsterdam UMC, Amsterdam, The Netherlands.                                       |
| Niels W.P. Rutjes MD                    | The Netherlands | Department of Pediatric Respiratory Medicine, Emma Children's Hospital, Amsterdam UMC, Amsterdam, The Netherlands.                                       |
| E. G. Haarman                           | The Netherlands | Department of Pediatric Respiratory Medicine, Emma Children's Hospital, Amsterdam UMC, Amsterdam, The Netherlands.                                       |
| T. Dekker                               | The Netherlands | Department of Experimental Immunology, Academic Medical Center (AMC), University of Amsterdam, Amsterdam, The Netherlands.                               |
| B.S Dierdorp                            | The Netherlands | Department of Experimental Immunology, Academic Medical Center (AMC), University of Amsterdam, Amsterdam, The Netherlands.                               |
| R. Khurshid                             | The Netherlands | Department of Experimental Immunology, Academic Medical Center (AMC), University of Amsterdam, Amsterdam, The Netherlands.                               |
| B. Kapitein, MD, PhD                    | The Netherlands | Paediatric Intensive Care, Emma Children's Hospital, Amsterdam UMC, Amsterdam, The Netherlands.                                                          |
| G. Biesbroek                            | The Netherlands | Department of Pediatric Respiratory Medicine, Emma Children's Hospital, Amsterdam UMC, Amsterdam, The Netherlands.                                       |
| J. Israels                              | The Netherlands | Department of Pediatric Respiratory Medicine, Emma Children's Hospital, Amsterdam UMC, Amsterdam, The Netherlands.                                       |
| C. Brackel                              | The Netherlands | Department of Pediatric Respiratory Medicine, Emma Children's Hospital, Amsterdam UMC, Amsterdam, The Netherlands.                                       |
| M. Verwaal – Maasstad                   | The Netherlands | Department of Pediatrics, Maasstad Hospital, Rotterdam, The Netherlands.                                                                                 |
| D. Seljogi                              | The Netherlands | Department of Pediatric Respiratory Medicine, Emma Children's Hospital, Amsterdam UMC, Amsterdam, The Netherlands.                                       |
| P.F.M. Mau Asam                         | The Netherlands | Department of Respiratory Medicine, Amsterdam UMC, University of Amsterdam, Amsterdam, The Netherlands.                                                  |
| S. J.A. Lone-Latif                      | The Netherlands | Department of Respiratory Medicine, Amsterdam UMC, University of Amsterdam, Amsterdam, The Netherlands.                                                  |
| Davey Stigters                          | The Netherlands | Utrecht University, Master Pharmacy, Utrecht, The Netherlands.                                                                                           |
| Emine Sariguney                         | The Netherlands | Department of Respiratory Medicine, Amsterdam UMC, University of Amsterdam, Amsterdam, The Netherlands.                                                  |
| André Franke                            | Germany         | Kiel                                                                                                                                                     |

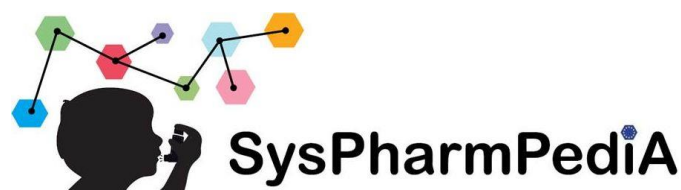

|                                       |                 |                                                                                                                                                                                                                                                                               |
|---------------------------------------|-----------------|-------------------------------------------------------------------------------------------------------------------------------------------------------------------------------------------------------------------------------------------------------------------------------|
| Juha Kere                             | Sweden/Finland  | Stockholm/Helsinki                                                                                                                                                                                                                                                            |
| Anne Örtqvist                         | Sweden          | Dept of Medical Epidemiology and Biostatistics, Karolinska Institutet, Stockholm, Sweden.                                                                                                                                                                                     |
| Vilhelmina Ullemar                    | Sweden          | Dept of Medical Epidemiology and Biostatistics, Karolinska Institutet, Stockholm, Sweden.                                                                                                                                                                                     |
| Karin Dellenvall                      | Sweden          | Dept of Medical Epidemiology and Biostatistics, Karolinska Institutet, Stockholm, Sweden.                                                                                                                                                                                     |
| Amir Hossein Alizadeh Bahmani, PharmD | The Netherlands | Amsterdam UMC location University of Amsterdam, Department of Pulmonary Medicine, Meibergdreef 9, Amsterdam, the Netherlands                                                                                                                                                  |
| Jelle M. Blankestijn, MSc             | The Netherlands | Amsterdam UMC location University of Amsterdam, Department of Pulmonary Medicine, Meibergdreef 9, Amsterdam, the Netherlands                                                                                                                                                  |
| Shahriyar Shahbazi Khamas, PharmD     | The Netherlands | Amsterdam UMC location University of Amsterdam, Department of Pulmonary Medicine, Meibergdreef 9, Amsterdam, the Netherlands                                                                                                                                                  |
| Natalia Hernandez-Pacheco, PhD        | Sweden          | Department of Clinical Science and Education, Södersjukhuset, Karolinska Institutet, Stockholm, Sweden.<br>CIBER de Enfermedades Respiratorias, Instituto de Salud Carlos III, Madrid, Spain.                                                                                 |
| Fabian Lorenzo-Diaz, PhD              | Spain           | Genomics and Health Group, Department of Biochemistry, Microbiology, Cell Biology and Genetics, Universidad de La Laguna, La Laguna, Santa Cruz de Tenerife, Spain.<br>Instituto de Enfermedades Tropicales y Salud Pública de Canarias (IETSPC), La Laguna, Tenerife, Spain. |

## Funding

The SysPharmPediA consortium is supported by ZonMW [project number: 9003035001], the Ministry of Education, Science, and Sport of the Republic of Slovenia [contract number C330-16-500106]; the German Ministry of Education and Research (BMBF) [project number FKZ 031L0088]; Instituto de Salud Carlos III (ISCIII) through Strategic Action for Health Research (AES) and European Community (EC) within the Active and Assisted Living (AAL) Program framework [award numbers AC15/00015 and AC15/00058] under the frame of the ERA-CoSysMed JTC-1 Call. MP-Y was also supported by a grant from the Ramón y Cajal Program (RYC-2015-17205) by MCIN/AEI/10.13039/501100011033 and by the European Social Fund “ESF Investing in your future”. JP-G was funded by the fellowship FPU19/02175 (Formación Profesorado Universitario Program) from the Spanish Ministry of Universities. EH-L was funded by fellowship PRE2018-083837 from MCIN/AEI /10.13039/501100011033 and the European Social Fund “Investing in your future”. MP-Y and JV were also supported by CIBER - Consorcio Centro de Investigación Biomédica en Red- (CIBERES), Instituto de Salud Carlos III (ISCIII), and European Regional Development Fund (CB06/06/1088). UP, VB and MG were funded by Slovenian Research Agency (research core funding No. P3-0427). MIA-A was funded by the Egyptian Government Ph.D. The STOPPA study was funded by the Swedish Research Council project grant 2018-02640 and the Swedish Asthma and Allergy Research Foundation.

Human samples and related data used in this study were provided by the Basque Biobank/Biodonostia Node [www.biobancovasco.org](http://www.biobancovasco.org) and were processed following standard operating procedures with appropriate approval of the relevant Ethics Committee and Scientific Advisory Board.
