# Supplementary material for: Epigenome-Wide Association Studies of the Fractional Exhaled Nitric Oxide and Bronchodilator Drug Response in Moderate-to-Severe Pediatric Asthma
Source: MDPI journal article supplement (doi:10.3390/biomedicines11030676), 2023-02-23
Supplement: s1 [file s1]

# Epigenome-Wide Association Studies of the Fractional Exhaled Nitric Oxide and Bronchodilator Drug Response in Moderate-to-Severe Pediatric Asthma

Mario Martin-Almeida <sup>1,†</sup>, Javier Perez-Garcia <sup>1,†</sup>, Esther Herrera-Luis <sup>1</sup>, Carlos Rosa-Baez <sup>1</sup>, Mario Gorenjak <sup>2</sup>, Anne H. Neerincx <sup>3</sup>, Olaia Sardón-Prado <sup>4,5</sup>, Antoaneta A. Toncheva <sup>6</sup>, Susanne Harner <sup>6</sup>, Christine Wolff <sup>6</sup>, Susanne Brandstetter <sup>6</sup>, Elisa Valletta <sup>6</sup>, Mahmoud I. Abdel-Aziz <sup>3,7</sup>, Simone Hashimoto <sup>3,8</sup>, Vojko Berce <sup>2,9</sup>, Paula Corcuera-Elosegui <sup>4</sup>, Javier Korta-Murua <sup>4,5</sup>, Heike Buntrock-Döpke <sup>6</sup>, Susanne J. H. Vijverberg <sup>3</sup>, Joris C. Verster <sup>10,11</sup>, Nikki Kerssemakers <sup>10</sup>, Anna M Hedman <sup>12</sup>, Catarina Almqvist <sup>12</sup>, Jesús Villar <sup>13,14</sup>, Aletta D. Kraneveld <sup>10</sup>, Uroš Potočnik <sup>2,9,15</sup>, Michael Kabesch <sup>6</sup>, Anke H. Maitland-van der Zee <sup>3,8</sup>, Maria Pino-Yanes <sup>1,13,16,\*</sup> and on behalf of the SysPharmPediA Consortium <sup>†</sup>

<sup>1</sup> Genomics and Health Group, Department of Biochemistry, Microbiology, Cell Biology, and Genetics, Universidad de La Laguna (ULL), 38200 San Cristóbal de La Laguna, Spain; alu0101103389@ull.edu.es (M.M.-A.); jpegarci@ull.edu.es (J.P.-G.); estherhrl@outlook.com (E.H.-L.); alu0101202372@ull.edu.es (C.R.-B.)

<sup>2</sup> Center for Human Molecular Genetics and Pharmacogenomics, Faculty of Medicine, University of Maribor, 2000 Maribor, Slovenia; mario.gorenjak@um.si (M.G.); vojko.berce@guest.arnes.si (V.B.); uros.potocnik@um.si (U.P.)

<sup>3</sup> Department of Respiratory Medicine, Amsterdam University Medical Centres—Loc. AMC, University of Amsterdam, 1105 AZ Amsterdam, The Netherlands; a.vanstuyvenbergneerincx@amsterdamumc.nl (A.H.N.); m.i.ibrahim@amsterdamumc.nl (M.I.A.-A.); s.hashimoto@amsterdamumc.nl (S.H.); s.j.vijverberg@amsterdamumc.nl (S.J.H.V.); a.h.maitland@amsterdamumc.nl (A.H.M.-v.d.Z.)

<sup>4</sup> Division of Pediatric Respiratory Medicine, Donostia University Hospital, 20014 San Sebastián, Spain; olaia.sardonprado@osakidetza.eus (O.S.-P.); paula.corcueraelosegui@osakidetza.eus (P.C.-E.); josejavier.kortamurua@osakidetza.eus (J.K.-M.)

<sup>5</sup> Department of Pediatrics, University of the Basque Country (UPV/EHU), 48013 San Sebastián, Spain

<sup>6</sup> Department of Pediatric Pneumology and Allergy, University Children's Hospital Regensburg (KUNO) at the Hospital St. Hedwig of the Order of St. John, University of Regensburg, D-93049 Regensburg, Germany; antoanetattoncheva@gmail.com (A.A.T.); susanne.harner@barmherzige-regensburg.de (S.H.); christine.wolff@barmherzige-regensburg.de (C.W.); susanne.brandstetter@barmherzige-regensburg.de (S.B.); elisa.valletta@barmherzige-regensburg.de (E.V.); heike.buntrock-doecke@barmherzige-regensburg.de (H.B.-D.); michael.kabesch@barmherzige-regensburg.de (M.K.)

<sup>7</sup> Department of Clinical Pharmacy, Faculty of Pharmacy, Assiut University, Assiut 71515, Egypt

<sup>8</sup> Department of Pediatric Respiratory Medicine, Emma Children's Hospital, Amsterdam UMC, 1105 AZ Amsterdam, The Netherlands

<sup>9</sup> Clinic of Pediatrics, University Medical Centre Maribor, 2000 Maribor, Slovenia

<sup>10</sup> Division of Pharmacology, Utrecht Institute for Pharmaceutical Sciences, Faculty of Science, Utrecht University, 3584 CG Utrecht, The Netherlands; j.c.verster@uu.nl (J.C.V.); n.kerssemakers@students.uu.nl (N.K.); a.d.kraneveld@uu.nl (A.D.K.)

<sup>11</sup> Centre for Human Psychopharmacology, Swinburne University, Melbourne, VIC 3122, Australia

<sup>12</sup> Department of Medical Epidemiology and Biostatistics, Karolinska Institutet, Solna, 171 77 Stockholm, Sweden; anna.hedman@ki.se (A.M.H.); catarina.almqvist@ki.se (C.A.)

- <sup>13</sup> CIBER de Enfermedades Respiratorias, Instituto de Salud Carlos III, 28029 Madrid, Spain; [jesus.villar54@gmail.com](mailto:jesus.villar54@gmail.com) (J.V.)
- <sup>14</sup> Multidisciplinary Organ Dysfunction Evaluation Research Network, Research Unit, Hospital Universitario Dr. Negrín, 35010 Las Palmas de Gran Canaria, Spain
- <sup>15</sup> Laboratory for Biochemistry, Molecular Biology, and Genomics, Faculty of Chemistry and Chemical Engineering, University of Maribor, 2000 Maribor, Slovenia
- <sup>16</sup> Instituto de Tecnologías Biomédicas (ITB), Universidad de La Laguna (ULL), 38200 San Cristóbal de La Laguna, Spain
- \* Correspondence: [mdelpino@ull.edu.es](mailto:mdelpino@ull.edu.es); Tel: +34-9223-16502-6343
- † These authors contributed equally to this work and share the first authorship.
- ‡ The SysPharmPediA consortium authors are listed in the Supplementary SI of this manuscript.

This Supplementary Information file contains the following items:

| <b>Table of contents</b>                                                                                          | <b>Page</b> |
|-------------------------------------------------------------------------------------------------------------------|-------------|
| <b>Supplementary Tables</b>                                                                                       |             |
| Table S1. Clinical and demographic characteristics of the individuals with methylation measured in nasal samples. | 3           |
| Table S2. Summary table of the quality control of methylation data.                                               | 4           |
| Table S3. Sensitivity analysis for the main EWAS findings.                                                        | 5           |
| Table S4. Evaluation of the effect of CpGs in nasal epithelial cells.                                             | 6           |
| Table S5. Summary results of sensitivity analyses stratifying by sex and age.                                     | 7           |
| Table S6. Summary results of the gene-set enrichment analysis for the EWAS of BDR.                                | 8           |
| <b>Supplementary Figures</b>                                                                                      |             |
| Figure S1. Principal component regression analysis plot of blood samples.                                         | 9           |
| Figure S2. Principal component regression analysis plot of nasal samples.                                         | 10          |
| Figure S3. CpG-set enrichment analysis plot for the top 100 CpGs associated with BDR.                             | 11          |

## SUPPLEMENTARY TABLES

**Supplementary Table S1.** Clinical and demographic characteristics of the individuals with nasal samples.

| Characteristics                    | n  | BDR               | n  | FeNO               |
|------------------------------------|----|-------------------|----|--------------------|
| Sex (male)                         | 52 | 34 (65.4)         | 48 | 32 (66.7)          |
| Age (years)                        | 52 | 12.1 (10.4–14)    | 48 | 12 (10.4–14)       |
| Ancestry                           | 51 |                   | 47 |                    |
| African                            |    | 2 (3.9)           |    | 2 (4.3)            |
| Asian                              |    | 1 (2)             |    | 1 (2.1)            |
| European                           |    | 43 (84.3)         |    | 39 (83)            |
| Latin                              |    | 3 (5.9)           |    | 3 (6.3)            |
| Mixed/other                        |    | 2 (3.9)           |    | 2 (4.3)            |
| Body mass index (z-score)          | 52 | 0.6 (-0.3–1.3)    | 48 | 0.6 (-0.4–1)       |
| Uncontrolled asthma                | 52 | 44 (84.6)         | 48 | 41 (85.4)          |
| pre-FEV <sub>1</sub> (predicted %) | 52 | 91.7 (81–101.7)   | 48 | 91.6 (80.9–103.2)  |
| pre-FVC (predicted %)              | 52 | 99.8 (91.7–107.8) | 48 | 100.3 (91.6–108.9) |
| BDR (%)                            | 52 | 6 (0.6–13)        | 48 | 5.2 (0.5–12.3)     |
| FeNO (ppb)                         | 51 | 13.3 (10.4–45.7)  | 48 | 14.8 (10.4–45.7)   |
| SABAs                              | 46 | 40 (87)           | 42 | 36 (90)            |
| LABAs                              | 46 | 44 (95.7)         | 42 | 40 (95.2)          |
| ICS                                | 46 | 46 (100)          | 42 | 42 (100)           |
| LTRA                               | 46 | 12 (26.1)         | 42 | 12 (28.6)          |
| OCS                                | 46 | 1 (2.2)           | 42 | 1 (2.4)            |
| Biological therapy <sup>†</sup>    | 46 | 5 (10.9)          | 42 | 5 (11.9)           |

Categorical variables are described as counts (percentage) and continuous variables as median (interquartile range). <sup>†</sup>Biological therapy: Mepolizumab or Omalizumab intake. **Abbreviations:** FEV<sub>1</sub>: Forced Expiratory Volume in the first second; FVC: forced vital capacity; BDR: Bronchodilator drug response; FeNO: Fractional exhaled nitric oxide; SABA: Short-Acting Beta-Agonists; LABAs: Long-Acting Beta-Agonists; ICS: Inhaled corticosteroids; LTRA: Leukotriene Receptor Antagonists; OCS: Oral corticosteroids.

**Supplementary Table S2.** Summary of the quality control.

| Tissue                                                                 | Blood   | Nasal   |
|------------------------------------------------------------------------|---------|---------|
| <b>CpG sites</b>                                                       |         |         |
| Initial number                                                         | 865,918 | 866,297 |
| Low quality probes                                                     | 21,683  | 46,843  |
| Probes within the sexual chromosomes (X and Y)                         | 18,648  | 17,893  |
| Multimodal probes                                                      | 12,168  | 85,589  |
| Cross-reactive/non-specific probes                                     | 40,870  | 43,254  |
| SNP at the CpG site                                                    | 24,007  | 24,208  |
| SNP at single base extension from a CpG site                           | 11,552  | 11,900  |
| Probes capturing SNPs                                                  | 55      | 55      |
| Remaining number of CpGs available for analysis                        | 773,260 | 636,555 |
| <b>Quality control of individuals</b>                                  |         |         |
| Initial number                                                         | 130     | 62      |
| Outlier or bad quality samples                                         | 1       | 3       |
| Individuals with sex discordance                                       | 1       | 1       |
| Individual with mixed genotype distributions on the control SNP probes | 0       | 2       |
| Related individuals                                                    | 4       | 1       |
| Total remaining samples                                                | 124     | 55      |
| Individuals with BDR and methylation data                              | 121     | 55      |
| Individuals with FeNO and methylation data                             | 109     | 50      |

**Abbreviations:** SNP: Single Nucleotide Polymorphism; BDR: Bronchodilator Drug Response; FeNO: Fractional exhaled Nitric Oxide.

**Supplementary Table S3.** Sensitivity analysis for the main EWAS findings.

| CpG        | Chr | Position† | Gene     | Main Analysis* |       |                       |       | Adjusted by ICS dosage* |        |       |                       | Adjusted by recruiting center* |        |       |                       | Only Europeans* |        |       |                        |
|------------|-----|-----------|----------|----------------|-------|-----------------------|-------|-------------------------|--------|-------|-----------------------|--------------------------------|--------|-------|-----------------------|-----------------|--------|-------|------------------------|
|            |     |           |          | n              | Coef  | SE                    | P     | n                       | Coef   | SE    | P                     | n                              | Coef   | SE    | P                     | n               | Coef   | SE    | P                      |
| FeNO       |     |           |          |                |       |                       |       |                         |        |       |                       |                                |        |       |                       |                 |        |       |                        |
| cg12835256 | 4   | 110651671 | PLA2G12A | 109            | 0.002 | 2.53x10 <sup>-9</sup> | 0.002 | 92                      | -0.015 | 0.002 | 2.22x10 <sup>-8</sup> | 109                            | -0.015 | 0.002 | 1.32x10 <sup>-8</sup> | 88              | -0.019 | 0.003 | 6.73x10 <sup>-10</sup> |
| cg19644580 | 21  | 19166676  | C21orf91 |                | 0.001 | 1.29x10 <sup>-7</sup> | 0.05  |                         | 0.006  | 0.001 | 7.93x10 <sup>-7</sup> |                                | 0.006  | 0.001 | 3.72x10 <sup>-7</sup> |                 | 0.003  | 0.001 | 6.96x10 <sup>-3</sup>  |
| BDR        |     |           |          |                |       |                       |       |                         |        |       |                       |                                |        |       |                       |                 |        |       |                        |
| cg06975120 | 9   | 139606856 | FAM69B   | 122            | 0.006 | 3.86x10 <sup>-7</sup> | 0.01  | 103                     | -0.037 | 0.007 | 6.13x10 <sup>-7</sup> | 122                            | -0.019 | 0.004 | 1.89x10 <sup>-6</sup> | 97              | -0.037 | 0.007 | 2.02x10 <sup>-7</sup>  |
| cg14985321 | 14  | 20823915  | PARP2    |                | 0.002 | 3.71x10 <sup>-7</sup> | 0.01  |                         | -0.010 | 0.002 | 1.28x10 <sup>-5</sup> |                                | -0.010 | 0.002 | 6.02x10 <sup>-6</sup> |                 | -0.011 | 0.002 | 1.50x10 <sup>-6</sup>  |
| cg26203256 | 10  | 111756055 | ADD3-AS1 |                | 0.004 | 1.85x10 <sup>-7</sup> | 0.01  |                         | -0.021 | 0.004 | 3.28x10 <sup>-7</sup> |                                | -0.037 | 0.006 | 9.06x10 <sup>-8</sup> |                 | -0.020 | 0.004 | 3.15x10 <sup>-6</sup>  |

†Position based on GRCh37/hg19 build. \*All models were also adjusted by age, sex, ethnicity, and tissue heterogeneity. **Abbreviations.** Coef: Coefficient expressed as log<sub>2</sub>(fold-change); SE: Standard error.

**Supplementary Table S4.** Evaluation of the effect of CpGs in nasal epithelial cells.

| CpG                                    | Chromosome | Position† | Gene            | Coef   | SE     | <i>p</i> -value |
|----------------------------------------|------------|-----------|-----------------|--------|--------|-----------------|
| <b>Bronchodilator drug response</b>    |            |           |                 |        |        |                 |
| cg26203256                             | 10         | 111756055 | <i>ADD3-AS1</i> | NA     | NA     | NA              |
| cg14985321                             | 14         | 20823915  | <i>PARP2</i>    | 0.0001 | 0.004  | 0.984           |
| cg06975120                             | 9          | 139606856 | <i>FAM69B</i>   | 0.005  | 0.009  | 0.564           |
| <b>Fractional exhaled nitric oxide</b> |            |           |                 |        |        |                 |
| cg12835256                             | 4          | 110651671 | <i>PLA2G12A</i> | -0.015 | 0.007  | 0.045           |
| cg19644580                             | 21         | 19166676  | <i>C21orf91</i> | 0.006  | -0.007 | 0.406           |

†Position based on GRCh37/hg19 build. **Abbreviations.** Coef: Coefficient expressed as log<sub>2</sub>(fold-change); SE: Standard error. NA: not available.

**Supplementary Table S5.** Summary results of sensitivity analyses stratifying by sex and age.

| CpG        | Chr | Pos       | Gene     | All individuals |        |       |                       |       | <13 years old |        |       |                       | ≥13 years old |        |       |                       | Males only |        |       | Females only          |    |        |       |                       |
|------------|-----|-----------|----------|-----------------|--------|-------|-----------------------|-------|---------------|--------|-------|-----------------------|---------------|--------|-------|-----------------------|------------|--------|-------|-----------------------|----|--------|-------|-----------------------|
|            |     |           |          | n               | logFC  | SE    | P                     | FDR   | n             | logFC  | SE    | P                     | n             | logFC  | SE    | P                     | n          | logFC  | SE    | P                     | n  | logFC  | SE    | P                     |
| FeNO       |     |           |          |                 |        |       |                       |       |               |        |       |                       |               |        |       |                       |            |        |       |                       |    |        |       |                       |
| cg12835256 | 4   | 110651671 | PLA2G12A | 109             | -0.015 | 0.002 | 2.53x10 <sup>-9</sup> | 0.002 | 64            | -0.016 | 0.003 | 7.30x10 <sup>-6</sup> | 45            | -0.013 | 0.004 | 0.003                 | 67         | -0.014 | 0.004 | 0.001                 | 42 | -0.016 | 0.003 | 1.86x10 <sup>-5</sup> |
| cg19644580 | 21  | 19166676  | C21orf91 |                 | 0.006  | 0.001 | 1.29x10 <sup>-7</sup> | 0.050 |               | 0.006  | 0.002 | 4.09x10 <sup>-4</sup> |               | 0.004  | 0.001 | 0.016                 |            | 0.001  | 0.001 | 0.363                 |    | 0.008  | 0.002 | 8.37x10 <sup>-5</sup> |
| BDR        |     |           |          |                 |        |       |                       |       |               |        |       |                       |               |        |       |                       |            |        |       |                       |    |        |       |                       |
| cg06975120 | 9   | 139606856 | FAM69B   |                 | -0.034 | 0.006 | 3.86x10 <sup>-7</sup> | 0.099 |               | -0.015 | 0.009 | 0.116                 |               | -0.053 | 0.009 | 9.13x10 <sup>-7</sup> |            | -0.017 | 0.007 | 0.018                 |    | -0.082 | 0.012 | 2.66x10 <sup>-8</sup> |
| cg14985321 | 14  | 20823915  | PARP2    | 122             | -0.010 | 0.002 | 3.71x10 <sup>-7</sup> | 0.099 | 71            | -0.010 | 0.003 | 0.002                 | 51            | -0.014 | 0.003 | 1.18x10 <sup>-4</sup> | 76         | -0.011 | 0.003 | 1.07x10 <sup>-4</sup> | 46 | -0.012 | 0.004 | 0.009                 |
| cg26203256 | 10  | 111756055 | ADD3-AS1 |                 | -0.020 | 0.004 | 1.86x10 <sup>-7</sup> | 0.099 |               | -0.024 | 0.005 | 3.14x10 <sup>-5</sup> |               | -0.017 | 0.006 | 0.008                 |            | -0.021 | 0.005 | 3.23x10 <sup>-4</sup> |    | -0.022 | 0.006 | 4.92x10 <sup>-4</sup> |

**Abbreviations:** logFC: log<sub>2</sub>(fold-change); SE: standard error; FDR: false discovery rate.

**Supplementary Table S6.** Summary results of the gene-set enrichment analysis for the EWAS of BDR.

| Term                                                                | <i>q</i> -value | Odds Ratio | Genes                               |
|---------------------------------------------------------------------|-----------------|------------|-------------------------------------|
| <b>Pathways</b>                                                     |                 |            |                                     |
| <b>WikiPathway 2021 Human</b>                                       |                 |            |                                     |
| IL-5 signaling pathway WP127                                        | 0.011           | 23         | <i>LYN, SYK, KRAS, SOS1</i>         |
| <b>KEGG 2021 Human</b>                                              |                 |            |                                     |
| C-type lectin receptor signaling pathway                            | 0.031           | 10.5       | <i>SYK, PRKCD, BCL3, CBLB, KRAS</i> |
| Fc epsilon RI signaling pathway                                     | 0.033           | 12.9       | <i>LYN, SYK, KRAS, SOS1</i>         |
| B cell receptor signaling pathway                                   | 0.043           | 10.7       | <i>LYN, SYK, KRAS, SOS1</i>         |
| <b>Biocarta 2016</b>                                                |                 |            |                                     |
| Fc Epsilon Receptor I Signaling in Mast Cells Homo sapiens          | 0.017           | 23.6       | <i>LYN, SYK, SOS1</i>               |
| BCR Signaling Pathway Homo sapiens                                  | 0.017           | 21.9       | <i>LYN, SYK, SOS1</i>               |
| IL 2 signaling pathway Homo sapiens                                 | 0.042           | 33.8       | <i>SYK, SOS1</i>                    |
| Telomeres, Telomerase, Cellular Aging, and Immortality Homo sapiens | 0.042           | 31.2       | <i>XRCC6, KRAS</i>                  |
| <b>Ontologies</b>                                                   |                 |            |                                     |
| <b>GO Biological Process 2021</b>                                   |                 |            |                                     |
| Positive regulation of protein dephosphorylation (GO:0035307)       | 0.031           | 27.6       | <i>MAGI2, PRKCD, CAMTA1, DUSP26</i> |

**Abbreviations:** GO: Gene Ontology.



## SUPPLEMENTARY FIGURES

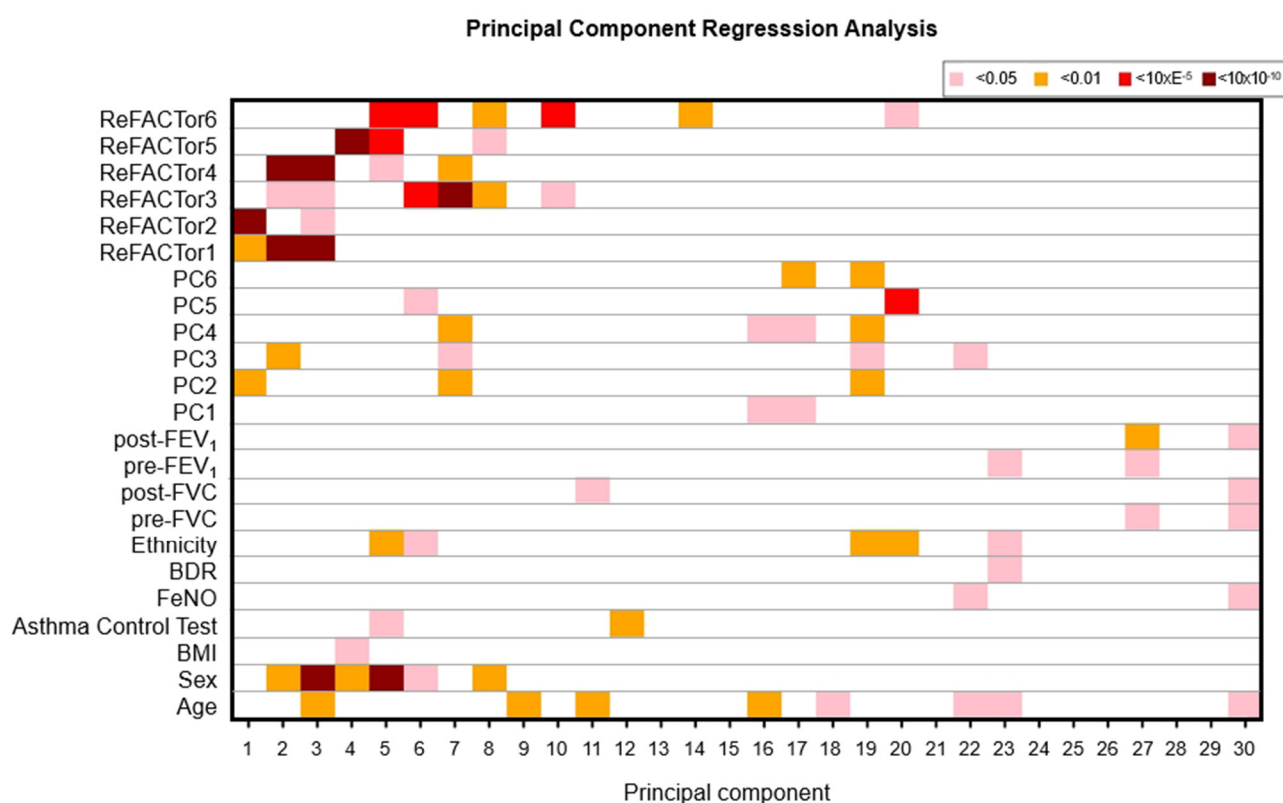

**Supplementary Figure S1.** Principal component regression analysis plot of blood samples. Top principal components are displayed along the X-axis, and covariates are displayed on the Y-axis. It shows with colors different levels of association p-values between principal components (PCs) and covariates. **Abbreviations:** PC: Principal component of genotype data; FEV<sub>1</sub>: Forced expiratory volume in the first second; FVC: Forced vital capacity; FeNO: Fractional exhaled nitric oxide; BDR: Bronchodilator drug response; BMI: Body mass index.

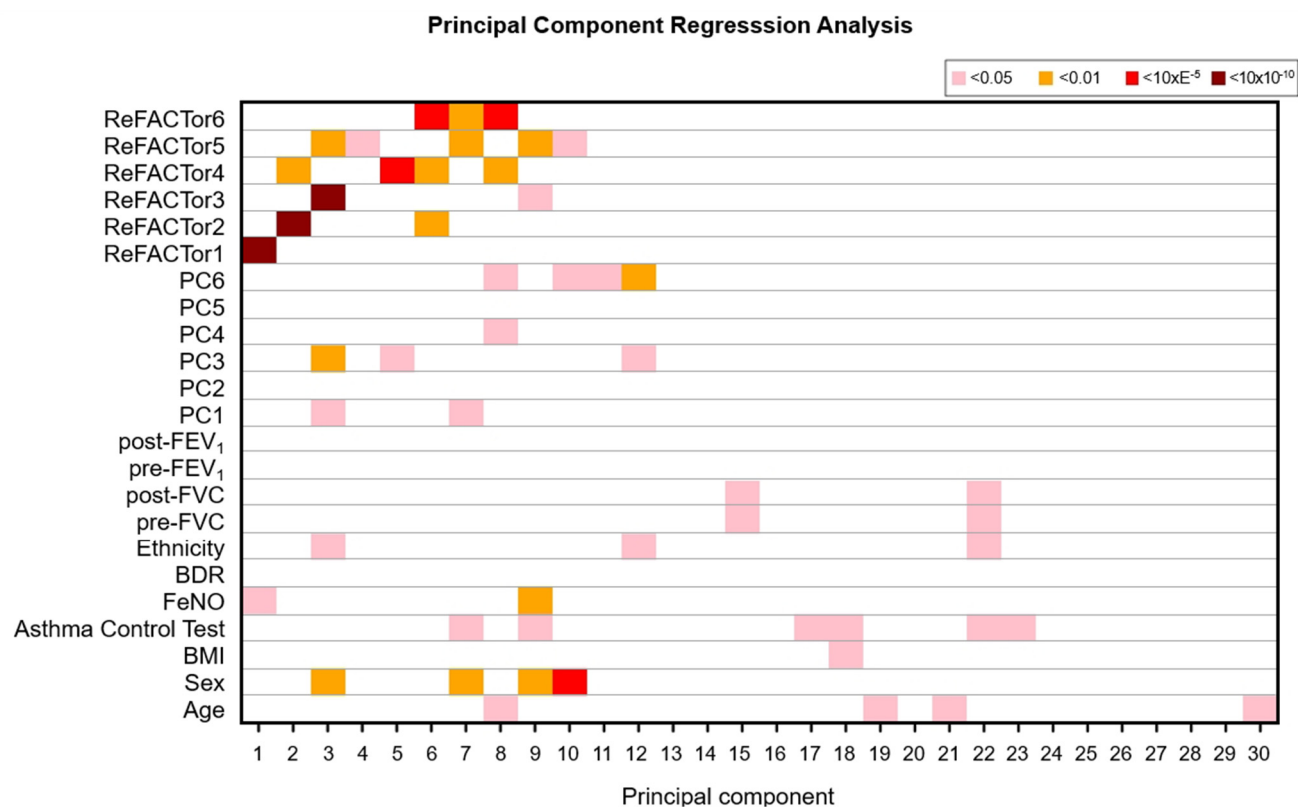

**Supplementary Figure S2.** Principal component regression analysis plot of nasal samples. Top principal components are displayed along the X-axis, and covariates are displayed on the Y-axis. It shows with colors different levels of association p-values between principal components (PCs) and covariates. **Abbreviations:** PC: Principal component of genotype data; FEV<sub>1</sub>: Forced expiratory volume in the first second; FVC: Forced vital capacity; FeNO: Fractional exhaled nitric oxide; BDR: Bronchodilator drug response; BMI: Body mass index.

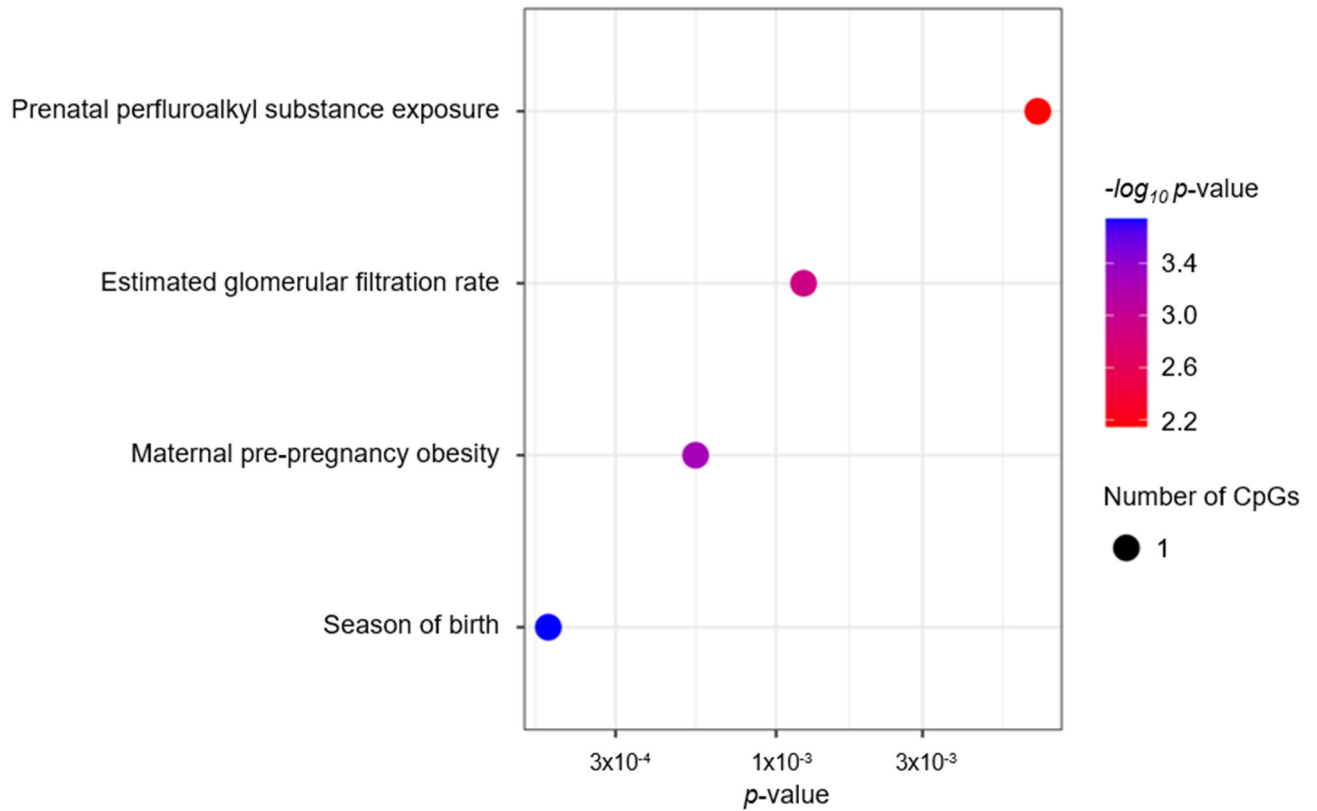

**Supplementary Figure S3.** Plot summarizing the trait-enrichment analysis for the top 100 CpGs for BDR in EWAS Atlas.  $p$ -values are displayed on the x-axis and traits on the y-axis. Blue shows the strongest associations, and the size of each point indicates the number of CpGs it correlates with.
